# Supplementary material
Source: PubMed Central journal article supplement (PMC4741335)
Supplement: supp_pp.15.00427_00427suppdata.pdf [file supp_pp.15.00427_00427suppdata.pdf]

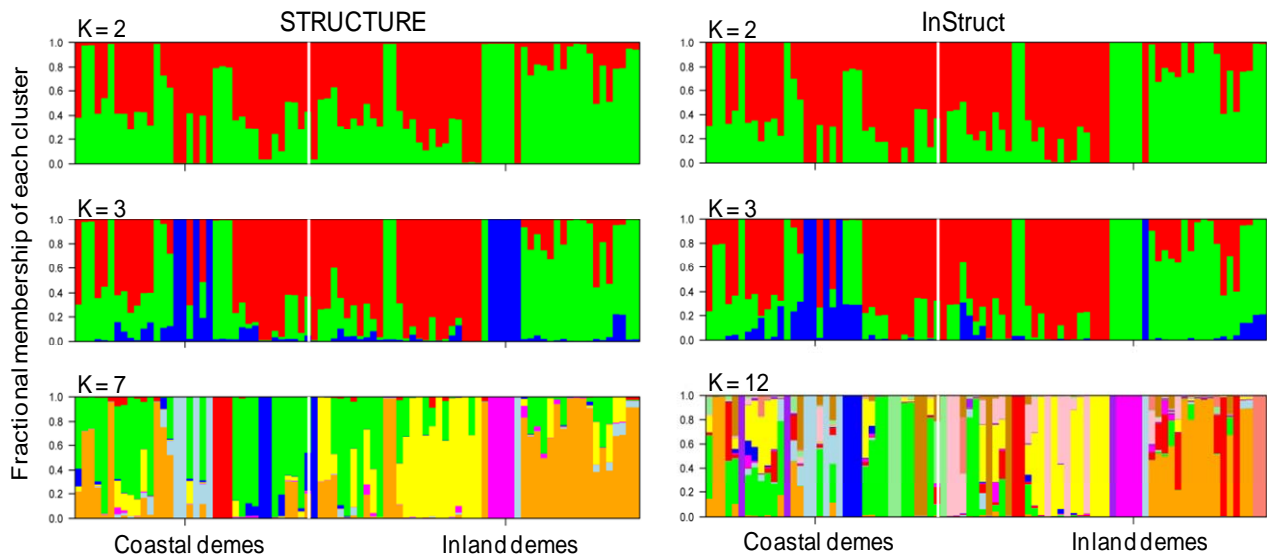

**Supplementary Figure S1.** Estimation of genetic structure within the Catalonian *A. thaliana* population using STRUCTURE and InStruct. Each vertical bar represents an individual plant genotyped at 425 genome-wide SNP markers, and each bar is divided into  $K$  coloured sections that indicate the fractional membership of an individual in  $K$  clusters based on its genotype. The figure of each  $K$  is based on the analysis with highest probability for that value of  $K$ . Vertical white line divides demes of coastal and inland origins. See Table S2 for details of which demes were genotypes.

A

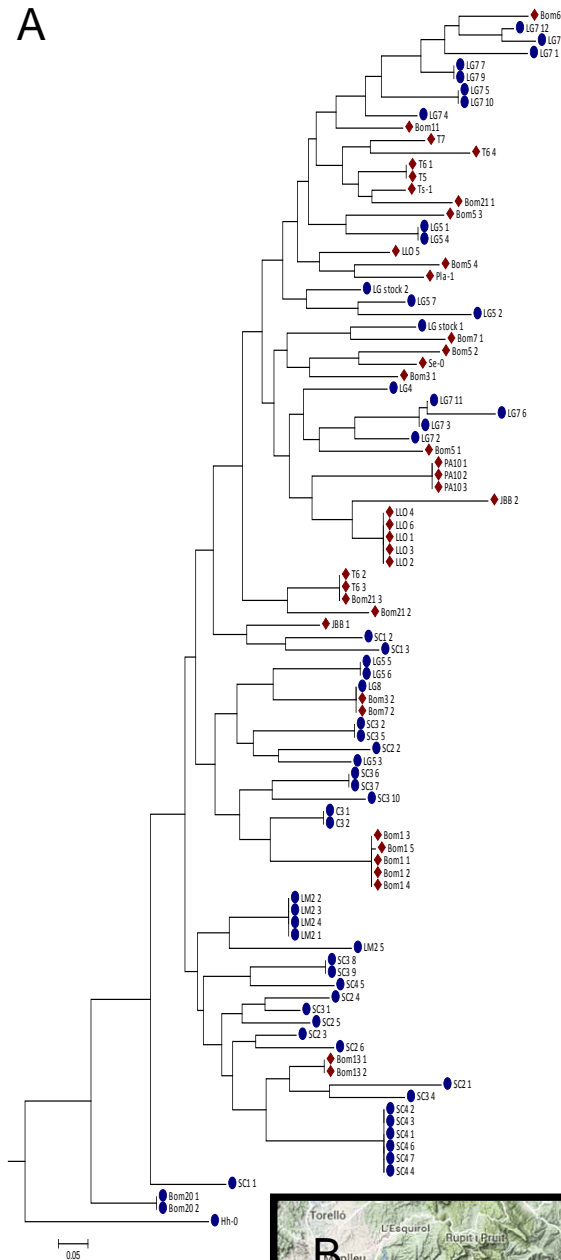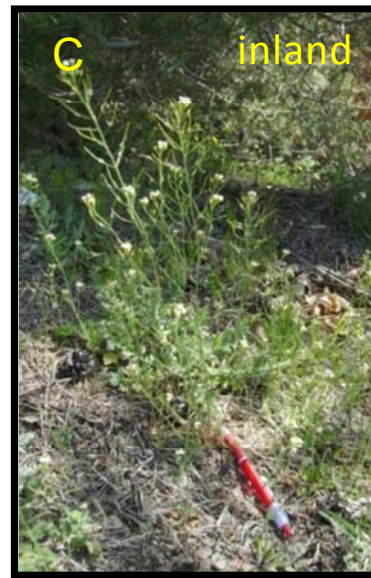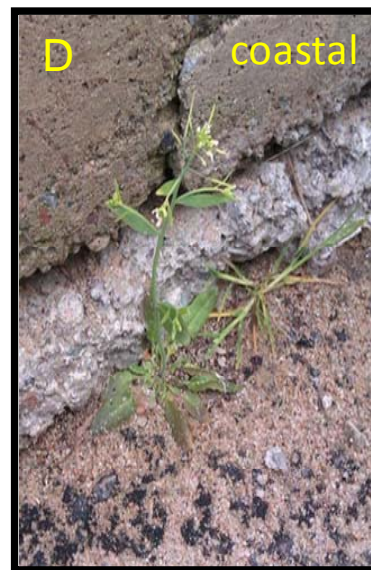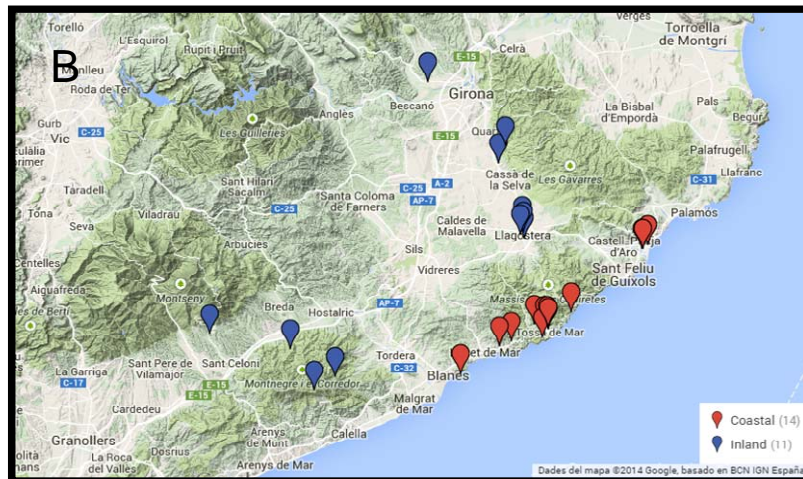

**Supplemental Figure S2.** Clustering of individual plants from coastal and inland demes by genotype. (A) Cladogram of 98 plants from 17 coastal (40 plants, red rhombus) and 13 inland (58 plants, blue circles) demes using 425 SNP markers aligned in ClustalX2 and performed using *MEGA 6.0*. (B) Map of north-eastern Catalonia, Spain with the location of *A. thaliana* demes used for the genetic clustering, reference: <https://www.google.com/maps/d/edit?mid=zK9pJcdixO40.kQSYnAmGzdr0> for Google map. Pictures of representative *A. thaliana* growing in inland (C) and coastal habitats (D).

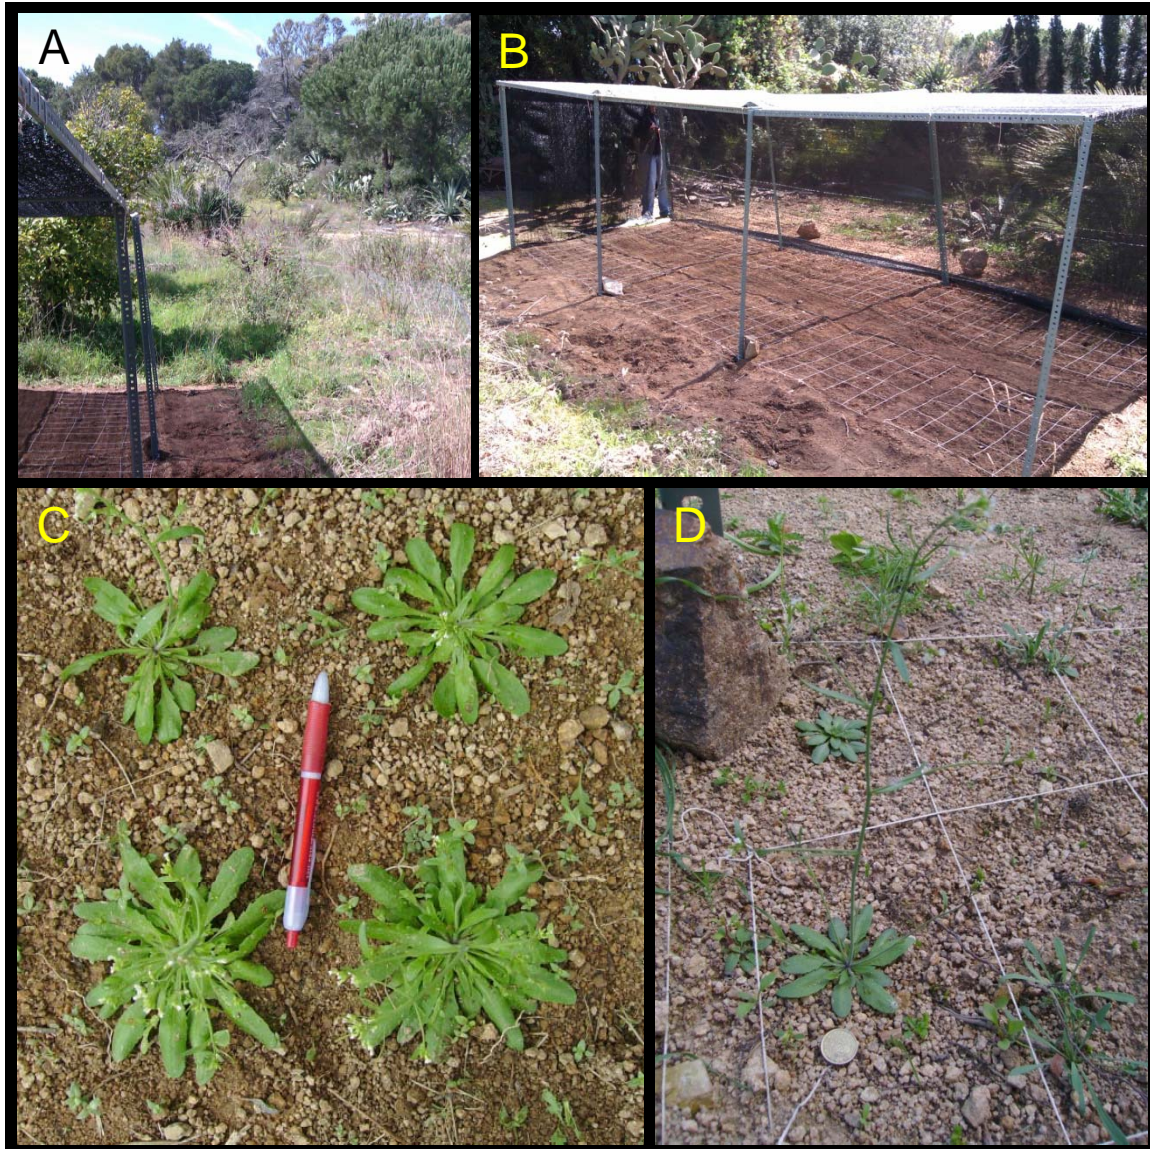

**Supplemental Figure S3.** Pictures of common garden plots used in the reciprocal transplant experiments in Marimurtra Botanical Garden, Blanes (A – D) and the School of Forestry and Agricultural Training at Santa Coloma de Farners (E – H). Picture illustrate the frame and cloth used to shade the plots and plants growing in grids within the plots.

continued

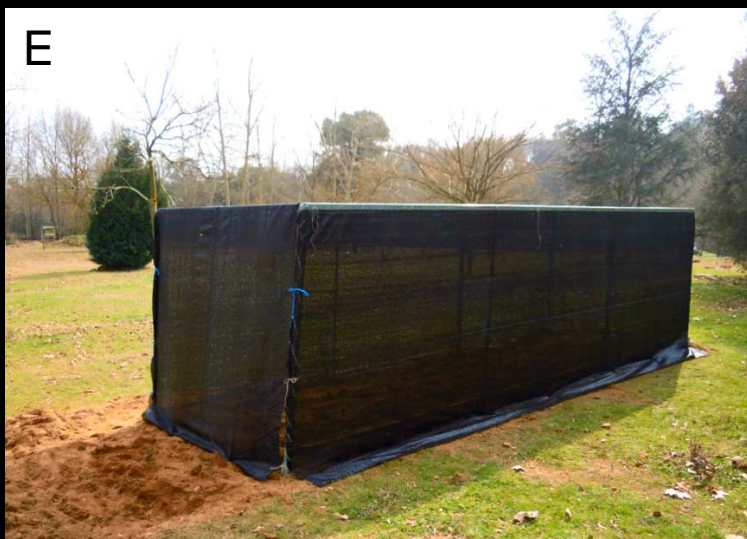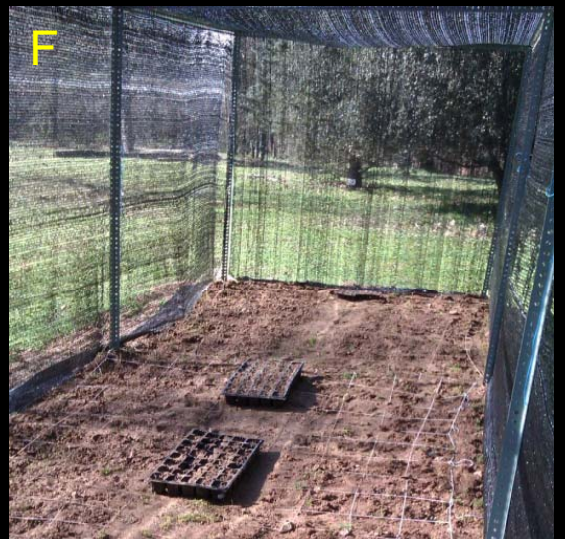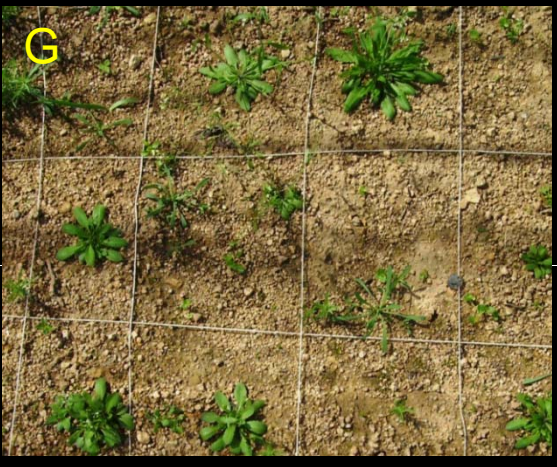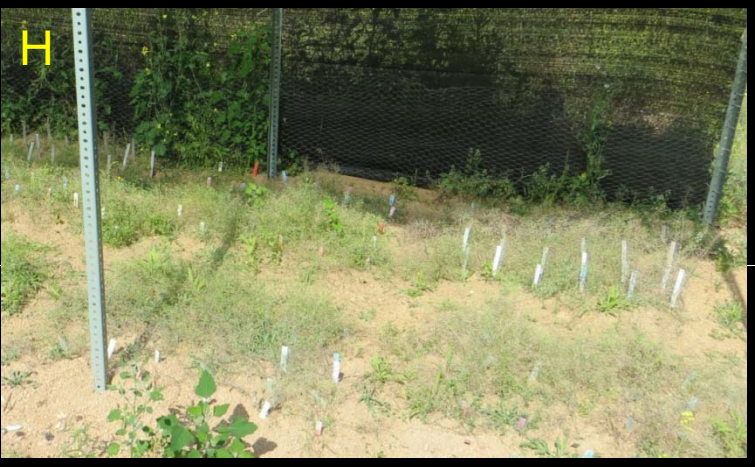

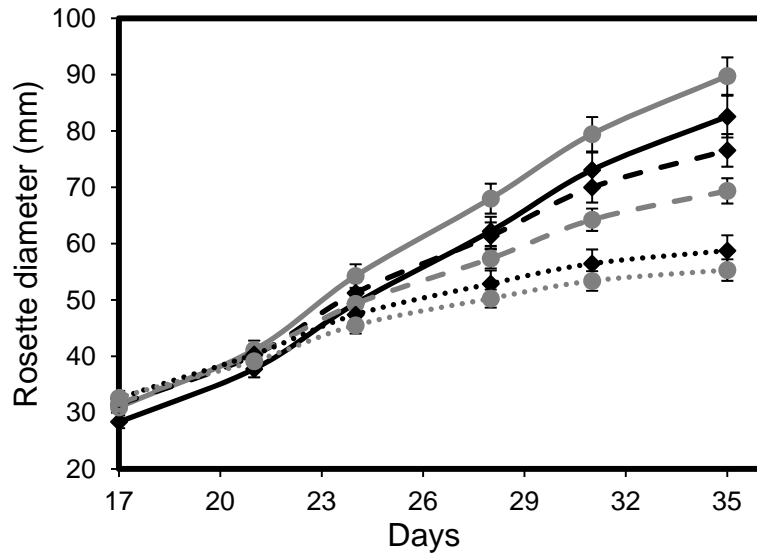

**Supplemental Figure S4.** Effects of NaCl treatments on growth of *A. thaliana* plants from coastal and inland demes. Growth of plants was measured as rosette diameter in plants from coastal (black diamonds) and inland (grey circles) demes after exposed to either 0 mM (solid lines), 50 mM (dashed lines) or 100 mM (dotted lines) NaCl in the hydroponic growth solution. Data represents the mean  $\pm$  SE ( $n = 6$  plants per deme and 13 demes from coastal and inland habitats, see Table S2 for details). Leaf tissue from these plants was used to measure leaf concentration of  $\text{Na}^+$  and  $\text{K}^+$  shown in Fig. 6, C to E.

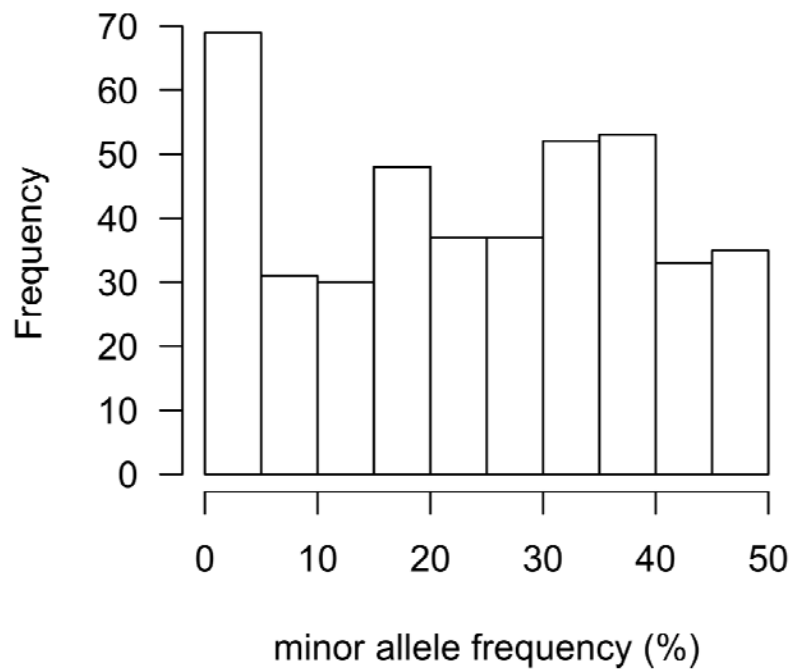

**Supplemental Figure S5.** Distribution of the minor allele frequency of 425 genome-wide single nucleotide polymorphism (SNP) markers across 98 *A. thaliana* individuals.

**Supplemental Table 1.** Summary of 20 ecological variables tested to perform the distribution map of *A. thaliana* in NE of Catalonia. Factors in bold had a significant influence.

| <b>Variable</b>                           | <b>Source</b>       | <b>Scale/Grid resolution</b> | <b>% of selected classes (*)</b> |
|-------------------------------------------|---------------------|------------------------------|----------------------------------|
| <b>Altimetry (hypsoetry, m)</b>           | <b>Gencat (ICC)</b> | <b>DMA (5 x 5 m )</b>        | <b>&lt; 50 %</b>                 |
| Soil covers 2007(MCSC-3v2)                | Gencat (CREAF)      | 2 x 2 m                      | > 50 %                           |
| <b>Land uses 2002(LANDSAT-TM)</b>         | <b>Gencat</b>       | <b>30 x 30 m</b>             | <b>&lt; 50 %</b>                 |
| <b>Geological base 2006</b>               | <b>Gencat (ICC)</b> | <b>1 : 50.000</b>            | <b>&lt; 50 %</b>                 |
| Habitats of Catalonia 2005                | Gencat (ICC, UB)    | 1 : 50.000                   | > 50 %                           |
| Annual temperature range (°C)             | Gencat (ACDC)       | 1 x 1 km                     | > 50 %                           |
| Potential Evapotranspiration              | Gencat (ACDC)       | 1 x 1 km                     | > 50 %                           |
| Climatic water deficit (CWD)              | Gencat (ACDC)       | 1 x 1 km                     | > 50 %                           |
| Daily global radiation, mean annual       | Gencat (ACDC)       | 1 x 1 km                     | > 50 %                           |
| Average annual precipitation (mm)         | Gencat (ACDC)       | 1 x 1 km                     | > 50 %                           |
| Average monthly precipitation (mm)        | Gencat (ACDC)       | 1 x 1 km                     | > 50 %                           |
| Seasonal precipitation (mm)               | Gencat (ACDC)       | 1 x 1 km                     | > 50 %                           |
| Average annual temperature (°C)           | Gencat (ACDC)       | 1 x 1 km                     | > 50 %                           |
| Average monthly temperature (°C)          | Gencat (ACDC)       | 1 x 1 km                     | > 50 %                           |
| Mean diurnal range                        | WorldClim           | 30 asec (1 km)               | > 50 %                           |
| Isothermality                             | WorldClim           | 30 asec (1 km)               | > 50 %                           |
| Maximum temperature of warmest month (°C) | WorldClim           | 30 asec (1 km)               | > 50 %                           |
| Minimum temperature of coldest month (°C) | WorldClim           | 30 asec (1 km)               | > 50 %                           |
| Precipitation of wettest month (mm)       | WorldClim           | 30 asec (1 km)               | > 50 %                           |
| Precipitation of driest month (mm)        | WorldClim           | 30 asec (1 km)               | > 50 %                           |

1

2 (\*) Percentage of classes for a given ecological variable across known locations of *A. thaliana*.

1 Table S3: The mean logarithmic likelihood of 10 runs at each K and the  
2 corresponding  $\Delta K$  statistic (peak value in bold).  
3

---

| K  | LnP(K)    | $\Delta K$  |
|----|-----------|-------------|
| 1  | -34817.11 | -           |
| 2  | -33102.57 | 2.78        |
| 3  | -31280.89 | 1.95        |
| 4  | -30105.85 | 0.09        |
| 5  | -28905.22 | 0.48        |
| 6  | -27477.83 | 3.40        |
| 7  | -26551.27 | <b>4.14</b> |
| 8  | -25712.01 | 0.64        |
| 9  | -25102.48 | 0.91        |
| 10 | -24176.93 | 0.21        |
| 11 | -23098.28 | 1.44        |
| 12 | -22277.81 | -           |

---

4



**Supplemental Table 4.** Concentration of selected plant mineral nutrients in soil from the habitat of coastal and inland *A. thaliana* demes.

| Element                            | Year | Location | N   | Mean (mg·g <sup>-1</sup> ) | Std Error | DF | F Ratio | Prob > F |
|------------------------------------|------|----------|-----|----------------------------|-----------|----|---------|----------|
| Ca <sup>2+</sup>                   | 2013 | Coastal  | 34  | 620.41                     | 23.78     | 1  | 0.14    | 0.7132   |
|                                    |      | Inland   | 28  | 633.49                     | 26.21     |    |         |          |
|                                    | 2014 | Coastal  | 114 | 706.65                     | 7.58      | 1  | 1.25    | 0.2644   |
|                                    |      | Inland   | 90  | 719.42                     | 8.53      |    |         |          |
| Ca <sup>2+</sup> /Mg <sup>2+</sup> | 2013 | Coastal  | 34  | 5.78                       | 0.58      | 1  | 4.91    | 0.0305   |
|                                    |      | Inland   | 28  | 7.68                       | 0.64      |    |         |          |
|                                    | 2014 | Coastal  | 114 | 5.54                       | 0.46      | 1  | 42.26   | <0.0001  |
|                                    |      | Inland   | 90  | 10.03                      | 0.52      |    |         |          |
| K <sup>+</sup>                     | 2013 | Coastal  | 34  | 102.97                     | 15.07     | 1  | 2.07    | 0.1556   |
|                                    |      | Inland   | 28  | 135.21                     | 16.60     |    |         |          |
|                                    | 2014 | Coastal  | 114 | 125.21                     | 9.01      | 1  | 2.20    | 0.1399   |
|                                    |      | Inland   | 90  | 145.31                     | 10.14     |    |         |          |
| Mg <sup>2+</sup>                   | 2013 | Coastal  | 34  | 143.02                     | 10.44     | 1  | 9.89    | 0.0026   |
|                                    |      | Inland   | 28  | 94.16                      | 11.51     |    |         |          |
|                                    | 2014 | Coastal  | 114 | 151.14                     | 5.93      | 1  | 24.40   | <0.0001  |
|                                    |      | Inland   | 90  | 107.04                     | 6.68      |    |         |          |
| Na <sup>+</sup>                    | 2013 | Coastal  | 34  | 59.82                      | 2.79      | 1  | 24.73   | <0.0001  |
|                                    |      | Inland   | 28  | 39.16                      | 3.08      |    |         |          |
|                                    | 2014 | Coastal  | 114 | 72.79                      | 2.95      | 1  | 28.66   | <0.0001  |
|                                    |      | Inland   | 90  | 48.99                      | 3.32      |    |         |          |
| Na <sup>+</sup> /K <sup>+</sup>    | 2013 | Coastal  | 34  | 1.59                       | 0.25      | 1  | 4.70    | 0.0341   |
|                                    |      | Inland   | 28  | 0.78                       | 0.28      |    |         |          |
|                                    | 2014 | Coastal  | 114 | 0.90                       | 0.07      | 1  | 10.55   | 0.0014   |
|                                    |      | Inland   | 90  | 0.56                       | 0.08      |    |         |          |
| Cl <sup>-</sup>                    | 2013 | Coastal  | 34  | 1.87                       | 0.06      | 1  | 45.41   | <0.0001  |
|                                    |      | Inland   | 28  | 1.26                       | 0.06      |    |         |          |
|                                    | 2014 | Coastal  | 114 | 1.68                       | 0.02      | 1  | 77.67   | <0.0001  |
|                                    |      | Inland   | 90  | 1.40                       | 0.02      |    |         |          |
| SO <sub>4</sub> <sup>-</sup>       | 2013 | Coastal  | 34  | 49.71                      | 2.00      | 1  | 67.67   | <0.0001  |
|                                    |      | Inland   | 28  | 26.42                      | 2.00      |    |         |          |
|                                    | 2014 | Coastal  | 114 | 62.21                      | 2.49      | 1  | 137.92  | <0.0001  |
|                                    |      | Inland   | 90  | 18.85                      | 2.73      |    |         |          |

**Supplemental Table 5.** Concentration of selected mineral nutrients in leaves from *A. thaliana* plants growing in the field in both coastal and inland habitats.

| Element                            | Year | Location | N   | Mean (mg·g <sup>-1</sup> ) | Std Error | DF | F Ratio | Prob > F |
|------------------------------------|------|----------|-----|----------------------------|-----------|----|---------|----------|
| Ca <sup>2+</sup>                   | 2013 | Coastal  | 30  | 27.41                      | 1.06      | 1  | 16.34   | 0.0002   |
|                                    |      | Inland   | 26  | 34.87                      | 1.56      |    |         |          |
|                                    | 2014 | Coastal  | 120 | 28.74                      | 0.83      | 1  | 28.72   | <0.0001  |
|                                    |      | Inland   | 107 | 36.31                      | 1.17      |    |         |          |
| Ca <sup>2+</sup> /Mg <sup>2+</sup> | 2013 | Coastal  | 30  | 7.03                       | 0.50      | 1  | 19.41   | <0.0001  |
|                                    |      | Inland   | 26  | 11.38                      | 0.89      |    |         |          |
|                                    | 2014 | Coastal  | 120 | 7.60                       | 0.29      | 1  | 48.99   | <0.0001  |
|                                    |      | Inland   | 107 | 10.92                      | 0.39      |    |         |          |
| K <sup>+</sup>                     | 2013 | Coastal  | 30  | 22.64                      | 1.14      | 1  | 6.28    | 0.0152   |
|                                    |      | Inland   | 26  | 28.17                      | 1.98      |    |         |          |
|                                    | 2014 | Coastal  | 120 | 25.35                      | 0.73      | 1  | 0.01    | 0.9429   |
|                                    |      | Inland   | 107 | 25.27                      | 0.76      |    |         |          |
| Mg <sup>2+</sup>                   | 2013 | Coastal  | 30  | 4.44                       | 1.14      | 1  | 8.66    | 0.0048   |
|                                    |      | Inland   | 26  | 3.32                       | 1.98      |    |         |          |
|                                    | 2014 | Coastal  | 120 | 4.08                       | 0.73      | 1  | 10.63   | 0.0013   |
|                                    |      | Inland   | 107 | 3.54                       | 0.76      |    |         |          |
| Na <sup>+</sup>                    | 2013 | Coastal  | 30  | 1.26                       | 0.20      | 1  | 19.89   | <0.0001  |
|                                    |      | Inland   | 26  | 0.29                       | 0.04      |    |         |          |
|                                    | 2014 | Coastal  | 120 | 0.71                       | 0.07      | 1  | 49.15   | <0.0001  |
|                                    |      | Inland   | 107 | 0.19                       | 0.02      |    |         |          |
| Na <sup>+</sup> /K <sup>+</sup>    | 2013 | Coastal  | 30  | 0.06                       | 0.011     | 1  | 17.45   | 0.0001   |
|                                    |      | Inland   | 26  | 0.01                       | 0.002     |    |         |          |
|                                    | 2014 | Coastal  | 120 | 0.03                       | 0.003     | 1  | 17.15   | <0.0001  |
|                                    |      | Inland   | 107 | 0.01                       | 0.003     |    |         |          |

1

**Supplemental Table 5.** Model specification including the fixed and random effects, error structure and inclusion of a variance covariate for each response variable analysed during the study. A ‘/’ denotes a nested random effect structure and ‘individual’ represents an observation level random effect.

| response variable                                       | fixed effects                                           | random intercept           | random slope     | variance covariate                              | error structure    |
|---------------------------------------------------------|---------------------------------------------------------|----------------------------|------------------|-------------------------------------------------|--------------------|
| <b>Field based reciprocal transplant experiments</b>    |                                                         |                            |                  |                                                 |                    |
| <i>Home vs away, local vs foreign</i>                   |                                                         |                            |                  |                                                 |                    |
| number of siliques                                      | transplant habitat x native habitat                     | native hab/deme individual | -                | -                                               | Poisson log-normal |
| <i>sympatric vs allopatric</i>                          |                                                         |                            |                  |                                                 |                    |
| number of siliques                                      | native habitat + deme + sympatric                       | native hab/deme individual | -                | -                                               | Poisson log-normal |
| <i>plant growth</i>                                     |                                                         |                            |                  |                                                 |                    |
| rosette diameter                                        | days <sup>2</sup> x native habitat x transplant habitat | Deme/plant                 | day <sup>2</sup> | $\sigma^2 \cdot e^{2\delta \cdot \text{day}^2}$ | Gaussian           |
| <b>Controlled environment common garden experiments</b> |                                                         |                            |                  |                                                 |                    |
| <i>Home vs away, local vs foreign</i>                   |                                                         |                            |                  |                                                 |                    |
| number of siliques                                      | transplant habitat x native habitat                     | native hab/deme individual | -                | -                                               | Poisson log-normal |
| <i>sympatric vs allopatric</i>                          |                                                         |                            |                  |                                                 |                    |
| number of siliques                                      | native habitat + deme + sympatric                       | native hab/deme individual | -                | -                                               | Poisson log-normal |
| <i>plant growth</i>                                     |                                                         |                            |                  |                                                 |                    |
| rosette diameter                                        | days <sup>2</sup> x native habitat x transplant habitat | deme/plant                 | day <sup>2</sup> | $\sigma^2 \cdot e^{2\delta \cdot \text{day}^2}$ | Gaussian           |
| <b>Salinity tolerance assays</b>                        |                                                         |                            |                  |                                                 |                    |
| <i>Plants grown in soil</i>                             |                                                         |                            |                  |                                                 |                    |
| number of siliques                                      | native habitat x NaCl treatment                         | native hab/deme            | -                | -                                               | Poisson            |
| rosette diameter                                        | days <sup>2</sup> x native habitat x NaCl treatment     | deme/plant                 | day <sup>2</sup> | $\sigma^2 \cdot e^{2\delta \cdot \text{day}^2}$ | Gaussian           |
| <i>Plants grown hydroponically</i>                      |                                                         |                            |                  |                                                 |                    |
| rosette diameter                                        | days <sup>2</sup> x native habitat x NaCl treatment     | deme/plant                 | day <sup>2</sup> | $\sigma^2 \cdot e^{2\delta \cdot \text{day}^2}$ | Gaussian           |
| Na <sup>+</sup>                                         | native habitat x NaCl treatment                         | native hab/deme            | -                | $\sigma_{NaCl,habitat}^2$                       | Gaussian           |
| K <sup>+</sup>                                          | native habitat x NaCl treatment                         | native hab/deme            | -                | -                                               | Gaussian           |
| NA <sup>+</sup> /K <sup>+</sup>                         | native habitat x NaCl treatment                         | native hab/deme            | -                | $\sigma_{NaCl,habitat}^2$                       | Gaussian           |
